# Supplementary material for: Semi-supervised learning approach to improve the predictability of data-driven rainfall-runoff model in hydrological data-sparse regions
Source: Copernicus journal article supplement (doi:10.5194/hess-2023-148), 2023-07-18
Supplement: Supplementary file 1 [file hess-2023-148-supplement.pdf]

1  
2  
3  
4  
5  
6  
7  
8  
9  
10  
11  
12  
13  
14  
15  
16  
17  
18  
19  
20  
21  
22  
23  
24  
25

**Supplementary material for**  
**Semi-supervised learning approach to improve the predictability of**  
**data-driven rainfall-runoff model in hydrological data-sparse**  
**regions**

Sunghyun Yoon<sup>1</sup> and Kuk-Hyun Ahn<sup>2</sup>

June 2023

<sup>1</sup>Assistant Professor, Department of Artificial Intelligence, Kongju National University, Cheon-an, South Korea; e-mail: [syoon@kongju.ac.kr](mailto:syoon@kongju.ac.kr)

<sup>2</sup>Associate Professor, Department of Civil and Environmental Engineering, Kongju National University, Cheon-an, South Korea, *Corresponding author*; e-mail: [ahnkukhyun@kongju.ac.kr](mailto:ahnkukhyun@kongju.ac.kr)

**Introduction**

To support the results and conclusions of the study titled "**Semi-supervised Learning Approach to Enhance Predictability in Data-Driven Rainfall-Runoff Models for Hydrologically Data-Scarce Regions**", this file consists of two texts, two tables, and six figures. These elements are specifically utilized in the designated section to reinforce the presented findings:

**Text S1**

- 2.4.2 The effect of the annealing process on the student model

**Text S2**

1 - 2.4.3 Comparison of our proposed framework to the fine-tuning approaches

2 **Tables S1-S2**

3 - 4.1 AR climatology and corresponding water availability over South Korea

4 **Figure S1**

5 - 2.4.2 The effect of the annealing process on the student model

6 **Figures S2- S4**

7 - 3.1 Evaluating semi-supervised learning in data-scarce regions

8 **Figure S5**

9 - 3.2 Evaluating the selection of the annealing process on the student model

10 **Figure S6**

11 - 3.3 Comparing our proposed model with rgn-LSTM-sep and rgn-LSTM-trans

12

13 **Text S1.**

14 This section offers additional details about the five structures used in  $\alpha(\mathfrak{t})$  for the comparison  
15 purpose. The provided annealing process (i.e., Eq. 12) in the main manuscript is used in our  
16 final framework. In addition to this, alternative formulations are developed as variant versions.  
17 Each subsequent formulation is applied to one of the five models (rgn-LSTM-vr1, rgn-LSTM-  
18 vr2, rgn-LSTM-vr3, rgn-LSTM-vr4, and rgn-LSTM-vr5), respectively.

19

20 
$$\alpha(\mathfrak{t}) = \alpha_0 \quad \forall \mathfrak{t} \quad \text{Eq. (S1)}$$

21 
$$\alpha(\mathfrak{t}) = \begin{cases} 0 & \mathfrak{t} \leq \mathcal{J} \\ \alpha_0 & \mathcal{J} < \mathfrak{t} \end{cases} \quad \text{Eq. (S2)}$$

22 
$$\alpha(\mathfrak{t}) = \begin{cases} 0 & \mathfrak{t} \leq \mathcal{J}' \\ \frac{\mathfrak{t}-\mathcal{J}'}{\mathcal{J}''-\mathcal{J}'} \alpha_0 & \mathcal{J}' < \mathfrak{t} \leq \mathcal{J}'' \\ \alpha_0 & \mathcal{J}'' < \mathfrak{t} \end{cases} \quad \text{Eq. (S3)}$$

$$\alpha(\mathfrak{t}) = \begin{cases} \alpha_0 & \mathfrak{t} \leq \mathcal{J}' \\ (1 - \frac{\mathfrak{t}-\mathcal{J}'}{\mathcal{J}''-\mathcal{J}'})\alpha_0 & \mathcal{J}' < \mathfrak{t} \leq \mathcal{J}'' \\ 0 & \mathcal{J}'' < \mathfrak{t} \end{cases} \quad \text{Eq. (S4)}$$

$$\alpha(\mathfrak{t}) = \begin{cases} 2 \times \alpha_0 & \mathfrak{t} \leq \mathcal{J} \\ 0 & \mathcal{J} < \mathfrak{t} \end{cases} \quad \text{Eq. (S5)}$$

3

4 where we utilize  $\alpha_0 = 1$ ,  $\mathcal{J} = 15$ ,  $\mathcal{J}' = 5$ , and  $\mathcal{J}'' = 25$  based on the epoch adopted in this  
 5 study.

6

7 The first model, rgn-LSTM-vr1, incorporates a  $\mathfrak{t}$ -invariant structure where labeled and  
 8 unlabeled data are equally treated. The second model, rgn-LSTM-vr2, highlights the  
 9 significance of unlabeled data specifically during the latter half of the epoch progression. For  
 10 the third and fourth models, rgn-LSTM-vr3 and rgn-LSTM-vr4, they employ  $\mathfrak{t}$ -varying  
 11 structures to gradually amplify or reduce the influence of unlabeled data. Lastly, the final model,  
 12 rgn-LSTM-vr5, maintains an identical structure to our proposed model while placing further  
 13 emphasis on the role of unlabeled data in the initial phase of the epoch progression.  
 14 Additionally, Figure S1 provides a visualization of how each of the  $\alpha(\mathfrak{t})$  formulations evolves  
 15 throughout the epoch progression.

16

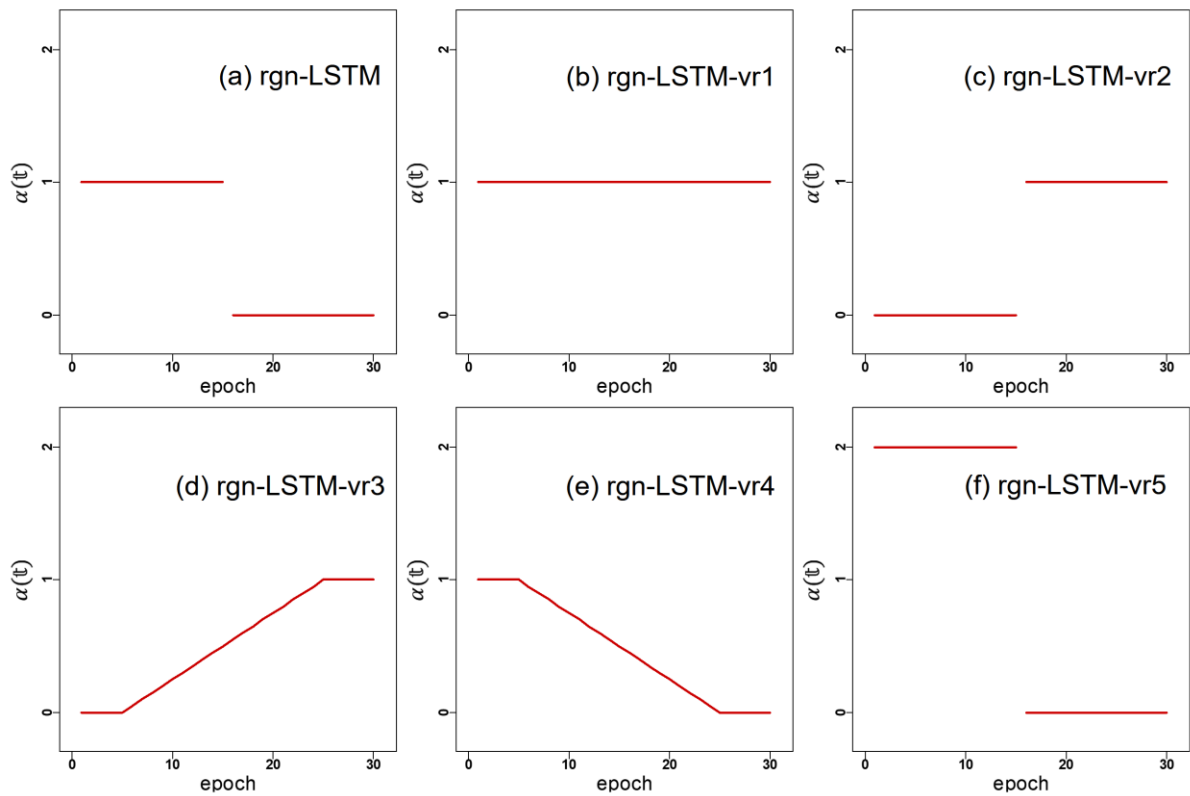

1  
2 Figure S1. Visualization of how each of the  $\alpha(t)$  formulations evolve corresponding to the  
3 considered six models (denoted in each plot).  
4

5 **Text S2.**

6 In this section, we present information about the recent technique developed by Ma et al. (2021),  
7 which we considered for comparison in our work. Given the similarity in responses required  
8 for rainfall-runoff modeling, there is a possibility that their representations in a data-driven  
9 model could exhibit similarities. Consequently, training a model with one regional dataset and  
10 transferring it to another region becomes possible. To achieve this, Ma et al. (2021) pretrained  
11 their models on a data-rich region and then transferred them to data-scarce regions as initial  
12 conditions. Following their approach, we also conducted tests using three different  
13 combinations (TL-a, TL-b, and TL-c) of transfer learning by controlling weight initialization  
14 and freezing. However, we only present the results of TL-c, as it outperformed the other tested  
15 models in our analysis (not shown). Our decision to use TL-c aligns with the findings of Ma et  
16 al. (2021), who also concluded it to be one of the best options. For our analysis, the regional

1 LSTM model was pretrained using 44 forcing variables across the 631 basins from the  
 2 CAMELS-GB dataset (see Table S1). For the pertaining model, we developed the model using  
 3 a 10-year dataset spanning from October 1, 1980, to September 30, 1990 (as the training period).  
 4 Additionally, we validated the model's performance using a separate 3-year dataset covering  
 5 the period from October 1, 1990, to September 30, 1993.

6

7 Table S1 List of the climate and basin attributes from CAMELS-GB dataset.

|                  | Variable name                           | Description                                               | Unit             |
|------------------|-----------------------------------------|-----------------------------------------------------------|------------------|
| Climate forcing  | precipitation                           | Catchment daily averaged precipitation                    | mm               |
|                  | temperature                             | Catchment daily averaged temperature                      | °C               |
|                  | humidity                                | Catchment daily averaged specific humidity                | °C               |
|                  | shortwave_rad                           | Catchment daily averaged downward shortwave radiation     | W/m <sup>2</sup> |
|                  | longwave_rad                            | Catchment daily averaged long-wave radiation              | W/m <sup>2</sup> |
|                  | windspeed                               | Catchment daily averaged wind speed                       | m/s              |
| Basin attributes | p_mean                                  | Catchment mean daily precipitation                        | mm               |
|                  | pet_mean                                | Catchment mean daily potential evapotranspiration         | mm               |
|                  | aridity                                 | Ratio of catchment mean PET to mean precipitation         | -                |
|                  | p_seasonality                           | Seasonality and timing of precipitation                   | -                |
|                  | inter_high_perc                         | Significant intergranular flow – high productivity        | %                |
|                  | q_mean                                  | Mean daily discharges                                     | mm               |
|                  | runoff_ratio                            | Ratio of mean daily discharge to mean daily precipitation | -                |
|                  | stream_elas                             | Streamflow precipitation elasticity                       | -                |
|                  | baseflow_index                          | Ratio of mean daily base flow to daily discharge          | -                |
|                  | Q5                                      | 5% flow quantile                                          | mm               |
|                  | Q95                                     | 95% flow quantile                                         | mm               |
|                  | dwood_perc                              | percentage cover of deciduous woodland                    | %                |
|                  | ewood_perc                              | percentage cover of evergreen woodland                    | %                |
|                  | grass_perc                              | percentage cover of grass and pasture                     | %                |
|                  | shrub_perc                              | percentage cover of medium-scale vegetation               | %                |
|                  | crop_perc                               | percentage cover of crops                                 | %                |
|                  | urban_perc                              | percentage cover of suburban and urban                    | %                |
|                  | inwater_perc                            | percentage cover of inland water                          | %                |
| bares_perc       | percentage cover of bare soil and rocks | %                                                         |                  |
| sand_perc        | percentage sand                         | %                                                         |                  |

|                      |                                                                                                                                       |                   |
|----------------------|---------------------------------------------------------------------------------------------------------------------------------------|-------------------|
| silt_perc            | percentage silt                                                                                                                       | %                 |
| clay_perc            | percentage clay                                                                                                                       | %                 |
| organic_perc         | percentage organic content                                                                                                            | %                 |
| bulkdens             | bulk density                                                                                                                          | g/cm <sup>3</sup> |
| tawc                 | total available water content                                                                                                         | mm                |
| porosity_cosby       | saturated water content estimated using a pedo-transfer function based on sand and clay fractions                                     | -                 |
| porosity_hyres       | saturated water content estimated using a pedo-transfer function based on silt, clay and organic fractions, bulk density, and topsoil | -                 |
| conductivity_cosby   | estimated using a pedo-transfer function based on sand and clay fractions                                                             | cm/h              |
| conductivity_hyres   | estimated using a pedo-transfer function based on sand and clay fractions                                                             | cm/h              |
| root_depth           | depth available for roots                                                                                                             | m                 |
| soil_depth_pelletier | depth to bedrock                                                                                                                      | m                 |
| gauge_lat            | gauge latitude                                                                                                                        | degree            |
| gauge_lon            | gauge longitude                                                                                                                       | degree            |
| gauge_elev           | gauge elevation                                                                                                                       | ma.s.l.           |
| area                 | catchmentarea                                                                                                                         | km <sup>2</sup>   |
| dpsbar               | catchment mean drainage path slope                                                                                                    | m/km              |
| elev_mean            | catchment mean elevation                                                                                                              | ma.s.l.           |
| elev_min             | catchment minimum elevation                                                                                                           | ma.s.l.           |

1  
2 To ensure the accurate reproduction of the results reported in Ma et al. (2021), we implemented  
3 their regional LSTM model using the CAMELS-GB dataset. For the training scenarios, we  
4 utilized 666 basins for the 1-year scenario and 668 basins for the 5-year scenario, following the  
5 train and test evaluation scheme outlined by Ma et al. (2021). Specifically, in the 1-year (5-  
6 year) training scenario, the models were trained from January 1, 2004, to January 1, 2005  
7 (January 1, 2000, to January 1, 2005), and subsequently tested from January 1, 2005, to January  
8 1, 2010 (January 1, 2005, to January 1, 2010). It is worth noting that the basin selection in our  
9 study differs slightly from that of Ma et al. (2021), who employed 667 basins in both scenarios.  
10 However, a significant majority of the basins overlap, and the performance statistics for the test  
11 phase in our study (see Table S2) exhibit similarities with the results reported in Ma et al. (2021)

1 (their Table S3). Based on these outcomes, we employed a regional LSTM model applied to  
2 basins across England for our comparative analysis.

3

4 Table S2 Validating the results in Ma et al. (2021) by developing the regional LSTM models.

| Utilized data | Temporal scenario | NSE <sub>mean</sub> | Ensemble NSE <sub>mean</sub> |
|---------------|-------------------|---------------------|------------------------------|
| CAMELS-GB     | 1-year training   | 0.728               | 0.706                        |
|               | 5-year training   | 0.830               | 0.804                        |

5

6

7

8

9

10

11

12

13

14

15

16

17

18

19

20

21

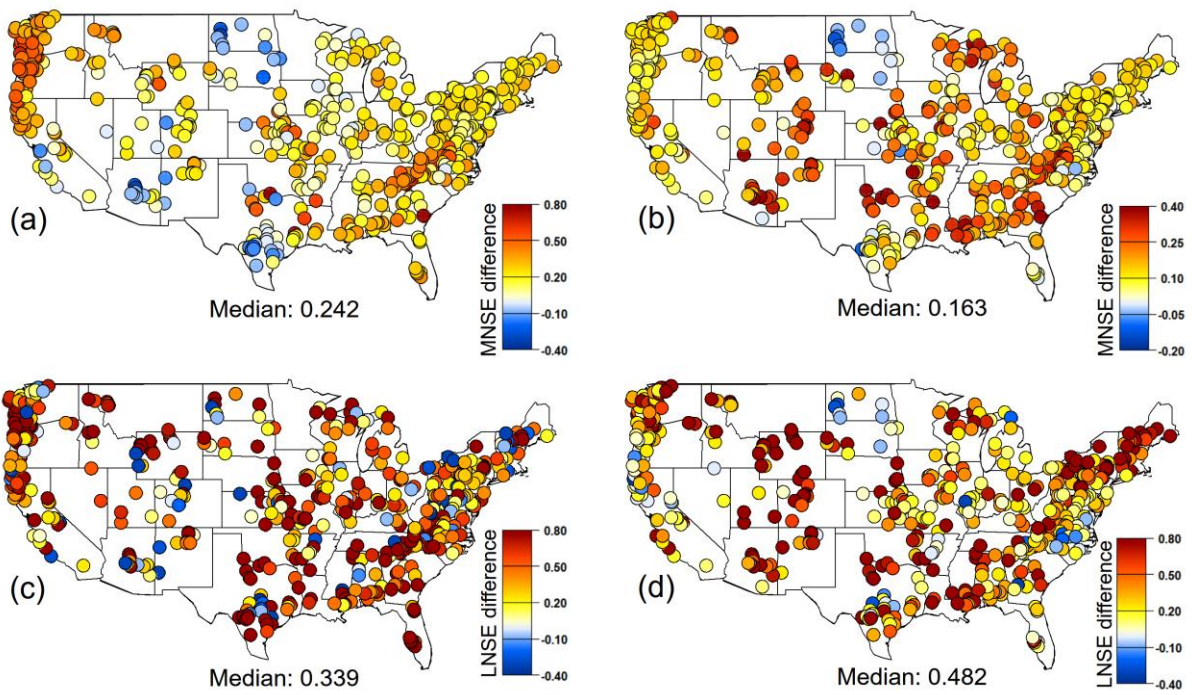

1

2 Figure S2. Difference of (a and b) MNSE and (c and d) LMSE results of idv-LSTM compared  
 3 to their baseline models for (left column) single and (right column) multi-year training  
 4 scenarios. The color maps are limited for enhanced visualization (see each subplot).

5

6

7

8

9

10

11

12

13

14

15

16

17

18

19

20

21

22

23

24

25

26

27

28

29



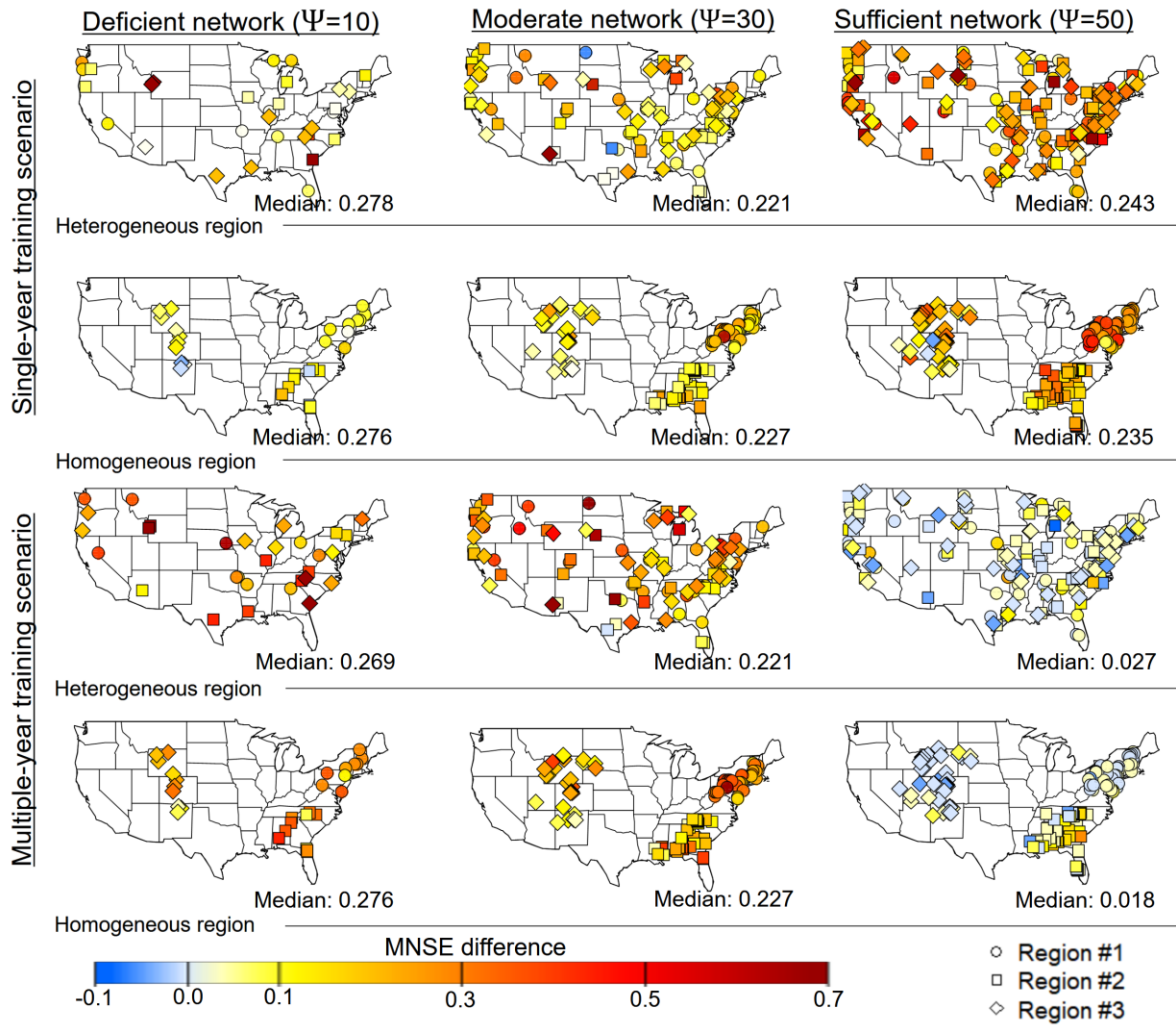

1  
2 Figure S3 Difference of MNSE results of rgn-LSTM compared to their baseline models across  
3 experimental factors including three defined regions, two training scenarios, and three basin  
4 densities in network. Here, the median MNSE differences across basins in three defined regions  
5 are presented in each plot.  
6  
7  
8  
9  
10  
11  
12  
13  
14  
15  
16  
17  
18  
19  
20  
21

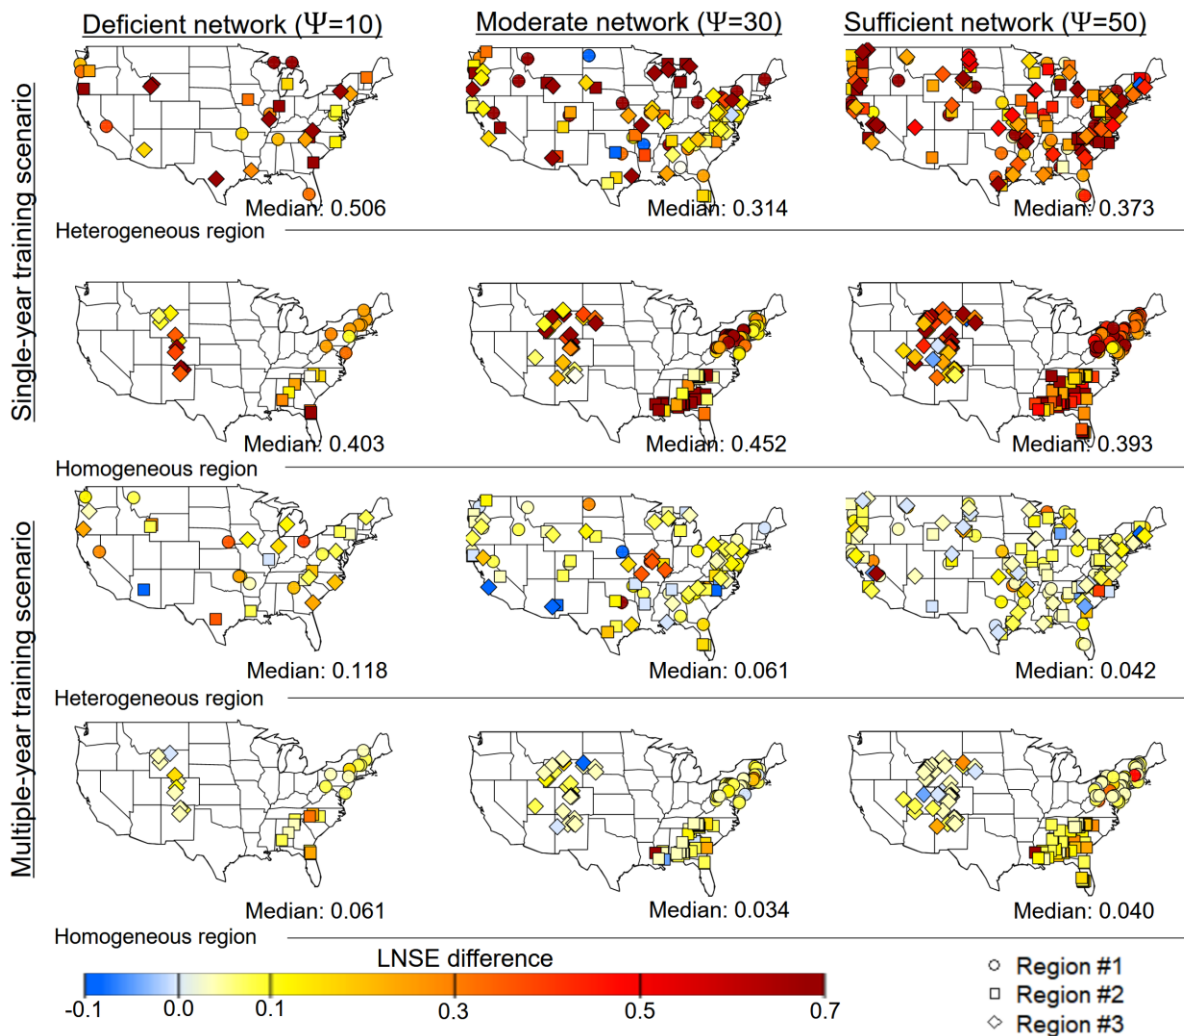

1  
2 Figure S4 Difference of LNSE results of rgn-LSTM compared to their baseline models across  
3 experimental factors including three defined regions, two training scenarios, and three basin  
4 densities in network. Here, the median LNSE differences across basins in three defined regions  
5 are presented in each plot.

6  
7  
8  
9  
10  
11  
12  
13  
14  
15  
16  
17  
18  
19  
20  
21

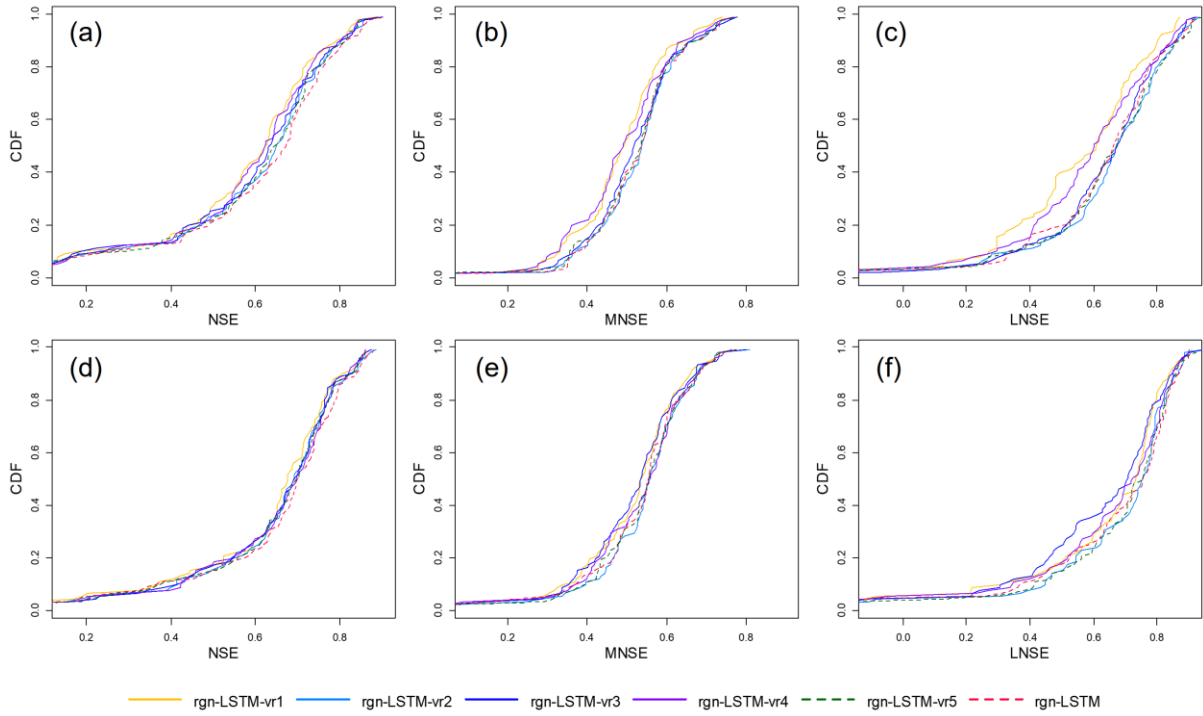

1  
2 Figure S5 Cumulative density functions of the results of the annealing process on rgn-LSTM  
3 with the multi-year training scenarios obtained for basins across (a), (b), (c) heterogeneous  
4 region; and (d), (e), (f) homogeneous region. Here, three metrics, namely NSE (first column),  
5 MNSE (second column), and LNSE (last column), are utilized.

6  
7  
8  
9  
10  
11  
12  
13  
14  
15  
16  
17  
18  
19  
20  
21  
22  
23  
24  
25  
26  
27  
28  
29  
30

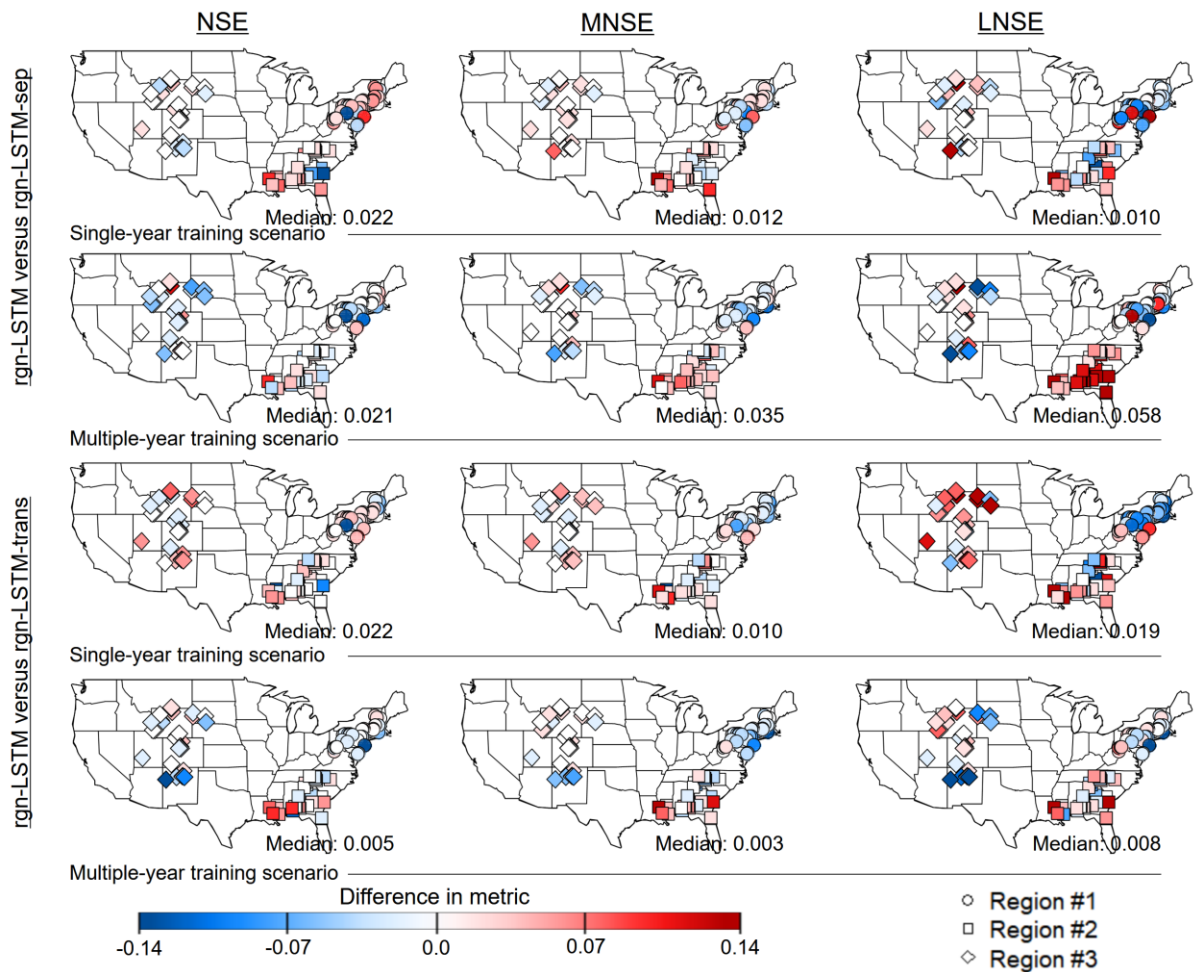

1  
2 Figure S6 Difference of performance in the three metrics, NSE (first column), MNSE (second  
3 column), and LNSE (third column), of rgn-LSTM compared to the two fine-tuning approaches  
4 (rgn-LSTM-sep and rgn-LSTM-trans) across three basin networks in homogeneous regions.  
5 Here, the median NSE differences across basins in three defined regions are presented in each  
6 plot.
